# Supplementary material
Source: publisher site journal article supplement (https://www.dovepress.com/article/342464)
Supplement: Supplementary file 1 [file get_supplementary_file.php]

## Supplemental Appendix 1 Scripted probes

### 1 Original version of the tested question

Q1: Since your stroke or last assessment, have you received any advice on health-related lifestyle changes or medications for preventing another stroke?

### 2 Appropriate probe questions

- (a) Can you repeat the question I just asked in your own words?
- (b) Can you tell me more about this?
- (c) What does the term "lifestyle changes" mean to you, in this question?
- (d) Was that easy or hard to answer?
- (e) How sure are you of your answer?
- (f) When I asked you " Since your stroke or last assessment ", what period do you think I am asking?  
(Since all the items include this assumption, the probe is only proposed in Q1)
- \* (g) I noticed that you hesitated. Please tell me what you are thinking?

### 1 Original version of the tested question

Q1: Since the stroke, have you received any advice on health-related lifestyle changes or medications for preventing another stroke?

### 2 Appropriate probe questions

- (a) Can you repeat the question I just asked in your own words?
- (b) Can you tell me more about this?
- (c) What does the term "lifestyle changes" mean to you, in this question?
- (d) Was that easy or hard to answer?
- (e) How sure are you of your answer?

### 1 Original version of the tested question

Q1: Since the stroke, have you received any advice on health-related lifestyle changes, such as diet and exercise, or medications for preventing another stroke?

### 2 Appropriate probe questions

- (a) Can you repeat the question I just asked in your own words?
- (b) Can you tell me more about this?
- (c) Was that easy or hard to answer?
- (d) How sure are you of your answer?

### 1 Original version of the tested question

Since the stroke, have you received any advice following:

- Advice on health-related lifestyle changes, such as diet and exercise (Q1a)
- Advice on medications for preventing another stroke (Q1b)

### 2 Appropriate probe questions

- (a) Can you repeat the question I just asked in your own words?
- (b) Can you tell me more about that?
- (c) Was that easy or hard to answer?
- (d) Is this question confusing?

### 1 Original version of the tested question

Since the stroke, have you received any advice following:

- Lifestyle changes, such as diet and exercise (Q1a)
- Medication suggestions (Q1b)

### 2 Appropriate probe questions

- (a) Can you repeat the question I just asked in your own words?
- (b) Can you tell me more about that?
- (c) Was that easy or hard to answer?
- (d) What does the term "medication suggestions" mean to you, in this question?

1 Original version of the tested question

Q2a. Since your stroke or last assessment, are you finding it more difficult to take care of yourself?

2 Appropriate probe questions

- (a) What does the term "take care of" mean to you, in this question?
- (b) Are you feeling offended when asked this question?
- (c) How sure are you that the stroke made your decline in self-care ability?
- \* (d) Are you saying that it becomes better now?
- \* (e) Do you mean that it got worse at the beginning, but it is no effect now?

1 Original version of the tested question

Q2a: Since the stroke, are you finding it more difficult to take care of yourself?

2 Appropriate probe questions

- (a) What does the term "take care of" mean to you, in this question?
- (b) Are you feeling offended when asked this question?
- (c) How sure are you that the stroke made your decline in self-care ability?

1 Original version of the tested question

Q2b: (Card sorts) Do you have difficulty with things following:

Dressing          Washing          Bathing  
Preparing hot drinks          Preparing meals          Getting outside

2 Appropriate probe questions

- (a) Do you find any expressions strange?
- (b) Are you feeling offended when asked this question?
- (c) Is this question confusing?

1 Original version of the tested question

Q2b: (Card sorts) Do you have difficulty with things following:

Dressing          Washing          Bathing          Getting outside  
Boiling water          Pouring boiled water          Preparing meals

2 Appropriate probe questions

- (a) Do you find any expressions strange?
- (b) What do the words "Boiling water" mean to you?
- (c) What do the words "Pouring boiled water" mean to you?
- (d) Are you feeling offended when asked this question?
- (e) Is this question confusing?

1 Original version of the tested question

Q3: Since your stroke or last assessment, are you finding it difficult to walk or move safely from bed to chair?

2 Appropriate probe questions

- (a) Can you repeat the question I just asked in your own words?
- (b) How sure are you of your answer?
- (c) How do you define "safety" in this question?
- (d) Was this question easy or difficult to answer?
- (e) Is this question clear?
- (f) Are you feeling offended when asked this question?
- \*(g) I noticed that you hesitated. Please tell me what you are thinking?

1 Original version of the tested question

Q3: Since the stroke, are you finding it difficult to walk or move safely from bed to chair?

2 Appropriate probe questions

Ditto

1 Original version of the tested question

Q3a: Since the stroke, are you finding it difficult to walk?

2 Appropriate probe questions

- (a) Can you repeat the question I just asked in your own words?
- (b) How sure are you of the answer that the stroke made it difficult to walk?
- (c) Was this question easy or difficult to answer?
- (d) Are you feeling offended when asked this question?

1 Original version of the tested question

Q3b: Since the stroke, are you finding it difficult to move safely from bed to chair?

2 Appropriate probe questions

- (a) Can you repeat the question I just asked in your own words?
- (b) How do you define "safety" in this question?
- (c) How sure are you of the answer that the stroke made it difficult to move safely from bed to chair?
- (d) Was this question easy or difficult to answer?
- (e) Are you feeling offended when asked this question?

**NOTE: As this is the first author's master's thesis, for reasons of confidentiality the full scripted probes are only given when the corresponding author and first author agree.**

## Supplemental Appendix 2 The Mandarin version of the Post-stroke Checklist

### 1. Secondary prevention

Since the stroke, have you received any advice following:

- Lifestyle changes, such as diet and exercise  
 Medication suggestions

YES to either →

Encourage stroke individuals to continue with secondary prevention, then give recommendations.

NO →

Refer to staff in primary health care institutions for risk factor assessment and treatment if appropriate

### 2. Activity of daily living (ADL)

Since the stroke, are you finding it more difficult to take care of yourself?

YES →

Do you have difficulty with things following:  
 Dressing  Washing  
 Bathing  Boiling water  
 Pouring boiled water  
 Preparing meals  
 Getting outside

If YES to any, refer to the community chronic disease management team or a rehabilitation physician for further assessment.

If NO, update the individual record and review it at the next assessment.

NO →

Please follow up on the rehabilitation status of post-stroke individuals.

### 3. Mobility

- Since the stroke, are you finding it difficult to walk?  
 Since the stroke, are you finding it difficult to move safely from bed to chair?

YES to either →

Are you continuing to receive rehabilitation therapy, such as acupuncture and massage?

If YES, update the individual record and review it at the next assessment.

If NO, refer to the community chronic disease management team or a rehabilitation physician for further assessment.

NO →

Please follow up on the rehabilitation status of post-stroke individuals.

### 4. Spasticity

Since the stroke, do you have stiffness in the following parts:

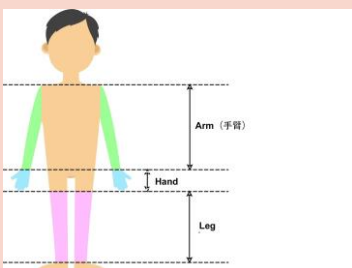

YES to any →

If YES, does the stiffness in [Body Parts] improve now?

If NO, Is the stiffness in [Body Parts] interfering with activities of daily living?

If YES, refer to a neurologist for further assessment and diagnosis.

If NO, update the individual record and review it at the next assessment.

If YES, update the individual record and review it at the next assessment.

NO →

Please follow up on the rehabilitation status of post-stroke individuals.

### 5. Pain

Since the stroke, do you have any new pain in your body?

YES →

Refer to a neurologist for further assessment and diagnosis.

NO →

Please follow up on the rehabilitation status of post-stroke individuals.

### 6. Incontinence

- Since the stroke, are you having more of a problem controlling your bladder?  
 Since the stroke, are you having more of a problem controlling your bowels?

YES to either →

Refer to a neurologist, neurosurgeon or urologist for further assessment and diagnosis.

NO →

Please follow up on the rehabilitation status of post-stroke individuals.

### 7. Communication

Since the stroke, are you finding it more difficult to communicate with others?

YES →

Refer to a specialist speech and language therapist for further assessment and diagnosis.

NO →

Please follow up on the rehabilitation status of post-stroke individuals.

### 8. Mood

Since the stroke, do you have the following emotional changes:

- Anxiety  
 Depression, for example, being in a low mood for a long period

YES to either →

Refer to a psychologist for further assessment and diagnosis.

NO →

Please follow up on the rehabilitation status of post-stroke individuals.

### 9. Cognition

Since the stroke, are you finding it more difficult to do the following things:

- think  concentrate  remember things

YES to any →

Does this interfere with your daily activities?

If YES, refer to a neurologist or neurosurgeon for further assessment and diagnosis.

If NO, update the individual record and review it at the next assessment.

NO →

Please follow up on the rehabilitation status of post-stroke individuals.

### 10. Life after stroke

Since the stroke, are you finding things important to you more difficult to carry out, such as hobbies and work?

YES →

Refer to a stroke support organization (e.g., the stroke club)

NO →

Please follow up on the rehabilitation status of post-stroke individuals.
